# Supplementary material for: The Fitness of Pseudomonas aeruginosa Quorum Sensing Signal Cheats Is Influenced by the Diffusivity of the Environment
Source: PubMed Central journal article supplement (PMC5414003; doi:10.1128/mbio.00353-17), 2017-05-02
Supplement: mbo002173272sf1.pdf [file mbo002173272sf1.pdf]

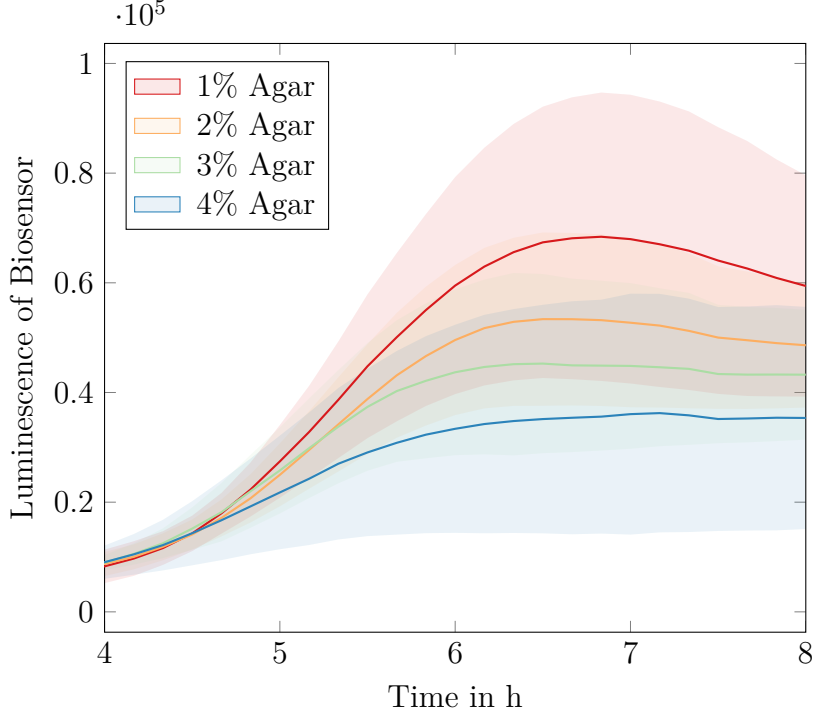

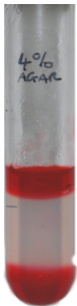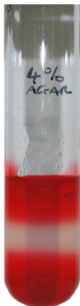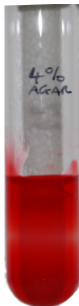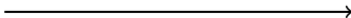

time
