# Supplementary material for: The Fitness of Pseudomonas aeruginosa Quorum Sensing Signal Cheats Is Influenced by the Diffusivity of the Environment
Source: PubMed Central journal article supplement (PMC5414003; doi:10.1128/mbio.00353-17), 2017-05-02

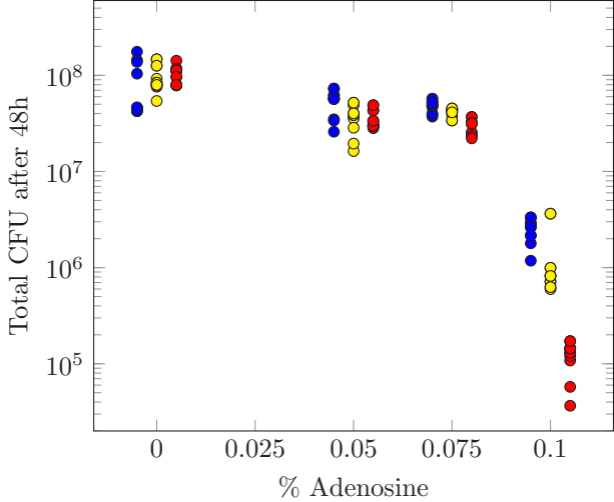

Supplement: mbo002173272sf3.pdf [file mbo002173272sf3.pdf]
